# Supplementary material for: ZnOHF nanostructure-based quantum dots-sensitized solar cells
Source: Royal Society of Chemistry journal article supplement (doi:10.1039/c2jm35620a), 2012-01-01
Supplement: c2jm35620a.pdf [file c2jm35620a.pdf]

## Supporting Information

# ZnOHF Nanostructure-Based Quantum Dots-Sensitized Solar Cells

*Haining Chen, Liqun Zhu, Qin Hou, Weitao Liang, Huicong Liu and Weiping Li\**

*(Key Laboratory of Aerospace Materials and Performance (Ministry of Education), School of Materials*

*Science and Engineering, Beihang University, Beijing 100191, China)*

Corresponding author. E-mail: Zhulq@buaa.edu.cn

---

\* Corresponding author. Tel. +86 1082317113. Fax: +86 1082317133. E-mail address: liweiping@buaa.edu.cn.

## 1. Experimental detail

### *Preparation*

The electrodeposition of ZnOHF nanostructures was carried out in a two-electrode cell and the working electrode was ITO glass with a sheet resistance of 15  $\Omega$ . A piece of pure zinc sheet was used as counter electrode. The aqueous electrolyte contained 0.05 M  $\text{Zn}(\text{NO}_3)_2$  and 0.1 M KF. Temperature was fixed at 60  $^\circ\text{C}$  and electrodeposition was carried out under potentiostatic condition 0.4 V vs. counter electrode. The electrodeposition duration varied from 5 s to 3 min.

ZnO HR was also electrodeposited in the two-electrode cell, but the electrolyte just contained 0.005 M  $\text{Zn}(\text{NO}_3)_2$ . The electrodeposition temperature, potential and duration were set at 75  $^\circ\text{C}$ , 0.7 V and 30 min respectively. Since our goal was to electrodeposit ZnO HR with the similar film thickness to ZnOHF (1 min), the concentration of  $\text{Zn}(\text{NO}_3)_2$  and other conditions were different from those used for the electrodeposition of ZnOHF nanostructures.

ZnOHF nanostructures, ZnO HR and ITO glass were co-sensitized with CdS and CdSe QDs by SILAR method. First, these samples were sensitized with CdS QDs by SILAR that involved the successive immersion in the aqueous solutions of 0.05 M  $\text{Cd}(\text{NO}_3)_2$ , water, 0.05 M  $\text{Na}_2\text{S}$  and water for 30 s and this procedure was repeated 30 times. Then, the CdS QDs-sensitized nanostructures were dipped into the ethanol solution of 0.5 M  $\text{Cd}(\text{NO}_3)_2$  for 5 min at room temperature and then immersed into aqueous solution of  $\text{Na}_2\text{SeSO}_3$  that was for 1 h at 50  $^\circ\text{C}$ , followed by rinsing with DI water and drying with an drier. The procedure was repeated 4 times<sup>1</sup>.

CdS/CdSe co-sensitized nanostructures were coated with ZnS by SILAR method. They were first immersed in the ethanol solution of 0.5 M  $\text{Zn}(\text{NO}_3)_2$  for 5 min, rinsed with DI water, and dried with the drier. Then, they were dipped the aqueous solution of 0.5 M  $\text{Na}_2\text{S}$  for 5 min, followed by rinsing with DI water and drying with the drier. The procedure was repeated 1 time<sup>1</sup>.

### *Characterizations*

X-ray diffraction (XRD) patterns were recorded on a Rigaku D/MAX-RB diffractometer with monochromatized Cu Ka radiation ( $k = 1.5418$ ). The field-emission gun scanning electron microscope (FESEM, Apollo 300) with an energy dispersive X-ray (EDX) spectroscopy system was used to evaluate the morphology and elemental composition of the samples. Transmission electron microscope (TEM, JEM-2100F) was used to evaluate transmission electron microscopy images of the samples.

UV-Vis diffuse reflectance spectra were recorded on a GBC spectrometer (Cintra 10e) equipped with an integrating sphere attachment in the wavelength range of 200-800 nm.

A two-electrode photoelectrochemical cell was used to study the photoelectrochemical performance of QDSCs. The aqueous solution containing 2 M  $\text{Na}_2\text{S}$  and 3 M S was used as electrolyte and  $\text{Cu}_2\text{S}$  as counter electrode<sup>2</sup>. The  $\text{Cu}_2\text{S}$  counter electrode was prepared by simply immersing pure Cu sheet in the polysulfide electrolyte. A xenon lamp (500 W) with the illumination intensity of  $\sim 100 \text{ mW}\cdot\text{cm}^{-2}$  and wavelength range of 380-700 nm was used as a light source. A CHI 600A electrochemical analyzer was employed to record the current and voltage obtained under illumination with an active area of  $0.25 \text{ cm}^2$ .

## 2. Supplemental Results

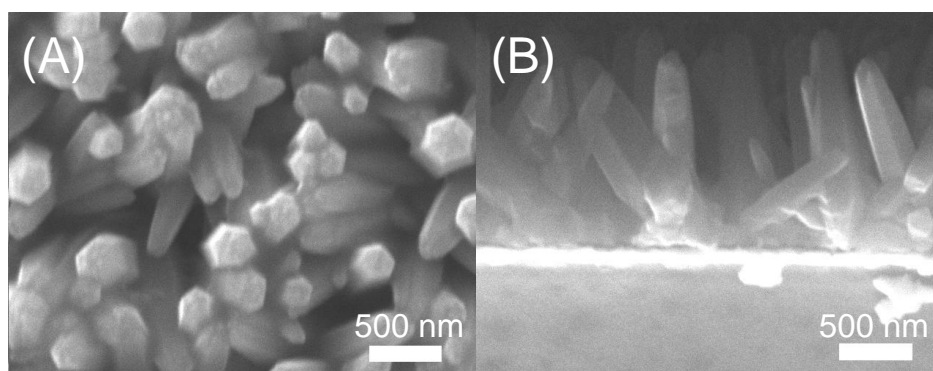

Figure S1. Top view and cross-section view of the ZnO HR electrodeposited in the aqueous electrolyte containing 0.005 M  $\text{Zn}(\text{NO}_3)_2$ .

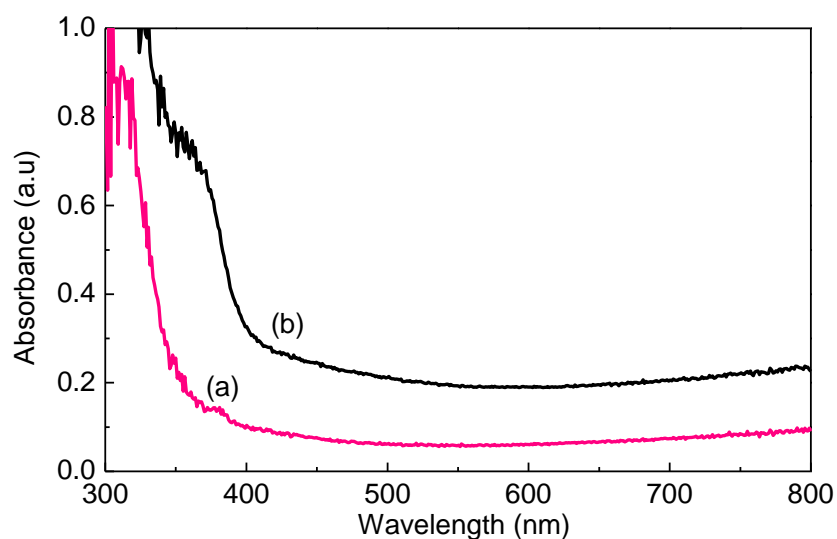

Figure S2. UV-Vis absorption spectra of (a) ZnOHF nanostructures and (b) ZnO HR. Compared with ZnO, ZnOHF exhibits larger band gap.

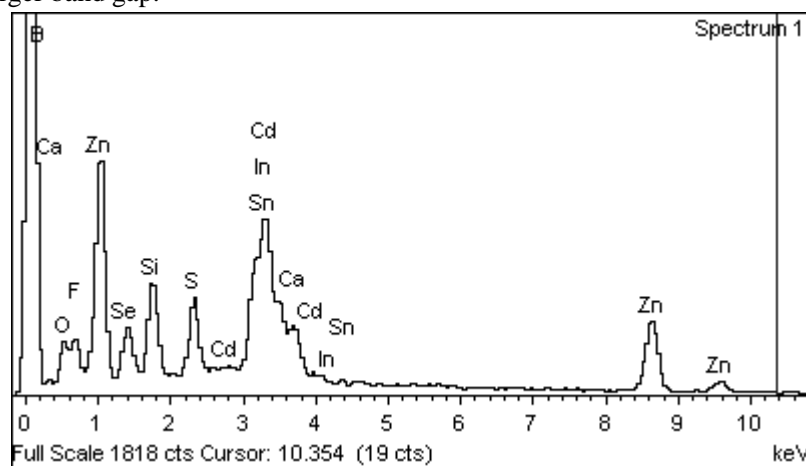

Figure S3. EDX spectrum of CdS/CdSe QDs co-sensitized ZnOHF nanostructures.

#### Supplemental References:

1. Z. Yang, C. Chen, C. Liu and H. Chang, *Chem. Commun.*, 2010, 46, 5485-5487.
2. S. Biswas, M. F. Hossain and T. Takahashi, *Thin Solid Films*, 2008, 517, 1284-1288.
